# Supplementary material for: Genomic screening reveals ubiquitin-like modifier activating enzyme 1 as a potent and druggable target in c-MYC-high triple negative breast cancer models
Source: PubMed Central journal article supplement (PMC9802478; doi:10.1093/pnasnexus/pgac232), 2022-10-11
Supplement: pgac232_supplemental_file.pdf [file pgac232_supplemental_file.pdf]

**Table S1. Top 400 genes (approximately 2% of total genes targeted) by STARS scores.**

| <b>BT549</b> |             |               |          |
|--------------|-------------|---------------|----------|
| Gene Symbol  | STARS Score | Average Score | p-value  |
| RAD9A        | 8.25        | 5.3           | 1.04E-06 |
| RNGTT        | 8.1         | 5.3           | 1.04E-06 |
| SBDS         | 7.62        | 5.41          | 2.08E-06 |
| PRC1         | 7.5         | 4.81          | 2.08E-06 |
| BUB3         | 7.4         | 4.75          | 3.12E-06 |
| C1orf109     | 7.29        | 4.73          | 4.16E-06 |
| PDCD2        | 7.27        | 4.57          | 4.16E-06 |
| LSM2         | 7.18        | 4.25          | 4.16E-06 |
| ATP6VOC      | 7.1         | 4.71          | 4.16E-06 |
| GINS2        | 7.08        | 4.67          | 4.16E-06 |
| ATP6V1F      | 7.05        | 4.42          | 4.16E-06 |
| RFC3         | 7.02        | 4.12          | 4.16E-06 |
| TXNL4A       | 6.99        | 4.59          | 5.20E-06 |
| WDR82        | 6.95        | 4.21          | 6.24E-06 |
| HSD17B12     | 6.92        | 4.58          | 7.28E-06 |
| CHAF1B       | 6.91        | 4.67          | 7.28E-06 |
| MCM5         | 6.9         | 4             | 7.28E-06 |
| ACTR1A       | 6.87        | 4.57          | 8.32E-06 |
| TINF2        | 6.79        | 3.97          | 1.04E-05 |
| ELP5         | 6.77        | 4.02          | 1.04E-05 |
| PSMD4        | 6.76        | 4.17          | 1.04E-05 |
| CIRH1A       | 6.71        | 4.13          | 1.14E-05 |
| RCC1         | 6.7         | 4.38          | 1.14E-05 |
| MRPL33       | 6.64        | 4.13          | 1.35E-05 |
| MAD2L2       | 6.63        | 4.01          | 1.35E-05 |
| GAPDH        | 6.62        | 4.07          | 1.35E-05 |
| YARS         | 6.6         | 3.93          | 1.35E-05 |
| GTF2H4       | 6.58        | 3.94          | 1.35E-05 |
| EXOSC6       | 6.58        | 4.71          | 1.46E-05 |
| VPS25        | 6.5         | 4.79          | 1.56E-05 |
| NAPG         | 6.41        | 3.65          | 2.08E-05 |
| SS18L2       | 6.4         | 4.45          | 2.08E-05 |
| MARS2        | 6.38        | 4.43          | 2.18E-05 |
| RPL12        | 6.35        | 3.82          | 2.29E-05 |
| LONP1        | 6.35        | 4.04          | 2.29E-05 |
| FDXR         | 6.33        | 4.09          | 2.49E-05 |
| DHX37        | 6.32        | 3.76          | 2.60E-05 |
| NCAPG        | 6.3         | 4.22          | 2.70E-05 |
| POLR2L       | 6.27        | 3.98          | 3.01E-05 |
| SOD1         | 6.27        | 3.98          | 3.01E-05 |
| ATP1A1       | 6.25        | 3.64          | 3.12E-05 |

| <b>MDA-MB-468</b> |             |               |          |
|-------------------|-------------|---------------|----------|
| Gene Symbol       | STARS Score | Average Score | p-value  |
| NIP7              | 8.31        | 5.14          | 1.04E-06 |
| C1orf109          | 8.24        | 4.98          | 1.04E-06 |
| WDR82             | 8.23        | 4.89          | 1.04E-06 |
| MRPS11            | 8.01        | 5.28          | 1.04E-06 |
| WDR18             | 7.75        | 4.84          | 2.08E-06 |
| MARS2             | 7.75        | 4.89          | 2.08E-06 |
| TAMM41            | 7.54        | 5.13          | 2.08E-06 |
| CRCP              | 7.51        | 5.09          | 2.08E-06 |
| NARFL             | 7.5         | 5.03          | 2.08E-06 |
| DYNLRB1           | 7.4         | 5             | 3.12E-06 |
| FARSB             | 7.09        | 4.15          | 4.16E-06 |
| DBR1              | 6.99        | 4.99          | 5.20E-06 |
| LONP1             | 6.82        | 4.47          | 1.04E-05 |
| ZBTB11            | 6.81        | 4.05          | 1.04E-05 |
| SPATA5L1          | 6.71        | 4.79          | 1.14E-05 |
| ATP6V1B2          | 6.68        | 3.82          | 1.25E-05 |
| ANKLE2            | 6.49        | 4.03          | 1.56E-05 |
| SS18L2            | 6.43        | 4.64          | 1.77E-05 |
| PMPCB             | 6.42        | 3.98          | 1.98E-05 |
| SOD2              | 6.41        | 3.84          | 1.98E-05 |
| ZMAT2             | 6.3         | 3.6           | 2.60E-05 |
| SCAP              | 6.29        | 4.39          | 2.81E-05 |
| YARS2             | 6.28        | 4.04          | 2.91E-05 |
| MMS22L            | 6.26        | 3.55          | 3.12E-05 |
| SARS              | 6.25        | 3.7           | 3.12E-05 |
| TAF6              | 6.14        | 4.46          | 3.64E-05 |
| EXOSC8            | 6.07        | 3.59          | 4.26E-05 |
| PPP1R8            | 6.03        | 3.88          | 4.78E-05 |
| POLR2L            | 6.02        | 3.93          | 4.89E-05 |
| LETM1             | 6.01        | 4.41          | 4.89E-05 |
| MAD2L2            | 5.99        | 3.62          | 5.20E-05 |
| CDAN1             | 5.96        | 3.71          | 5.72E-05 |
| CYC1              | 5.93        | 3.68          | 5.82E-05 |
| BUB3              | 5.92        | 4.34          | 5.82E-05 |
| TAF1C             | 5.91        | 3.74          | 5.93E-05 |
| HSPE1             | 5.9         | 3.36          | 6.13E-05 |
| SNAPC5            | 5.89        | 3.71          | 6.44E-05 |
| RPL23             | 5.88        | 3.64          | 6.44E-05 |
| NOA1              | 5.87        | 3.53          | 6.76E-05 |
| CIRH1A            | 5.85        | 3.88          | 6.76E-05 |
| DPAGT1            | 5.85        | 4.37          | 6.96E-05 |

|            |      |      |          |
|------------|------|------|----------|
| YARS2      | 6.24 | 5.18 | 3.12E-05 |
| TOP2A      | 6.21 | 3.68 | 3.43E-05 |
| C9orf114   | 6.18 | 3.69 | 3.64E-05 |
| RFC2       | 6.17 | 5.1  | 3.64E-05 |
| TPI1       | 6.16 | 3.53 | 3.64E-05 |
| POLR3A     | 6.16 | 3.97 | 3.64E-05 |
| DYNLRB1    | 6.16 | 4.02 | 3.64E-05 |
| NOP58      | 6.15 | 3.96 | 3.64E-05 |
| WDR55      | 6.06 | 4.01 | 4.26E-05 |
| TAF1C      | 6    | 4.13 | 5.20E-05 |
| DYNC1I2    | 6    | 3.8  | 5.20E-05 |
| MNAT1      | 5.98 | 3.44 | 5.30E-05 |
| ZMAT2      | 5.98 | 3.91 | 5.41E-05 |
| GPN1       | 5.97 | 3.85 | 5.61E-05 |
| RPL4       | 5.94 | 3.94 | 5.82E-05 |
| DPAGT1     | 5.93 | 4.07 | 5.82E-05 |
| MARS       | 5.89 | 3.87 | 6.34E-05 |
| ESPL1      | 5.87 | 4.24 | 6.44E-05 |
| RPL37      | 5.87 | 3.64 | 6.65E-05 |
| RNMT       | 5.86 | 3.7  | 6.76E-05 |
| NELFB      | 5.86 | 4.22 | 6.76E-05 |
| NHLRC2     | 5.86 | 3.4  | 6.76E-05 |
| MRPS11     | 5.85 | 3.71 | 6.76E-05 |
| GUK1       | 5.85 | 4.35 | 6.76E-05 |
| CPSF4      | 5.85 | 3.32 | 6.96E-05 |
| GGPS1      | 5.84 | 3.68 | 6.96E-05 |
| PRELID1    | 5.83 | 4.03 | 6.96E-05 |
| TARDBP     | 5.81 | 3.38 | 7.07E-05 |
| PWP2       | 5.81 | 3.55 | 7.28E-05 |
| OR4F21     | 5.8  | 3.41 | 7.48E-05 |
| WDR18      | 5.79 | 3.83 | 7.59E-05 |
| LUC7L3     | 5.77 | 3.66 | 7.80E-05 |
| GINS1      | 5.76 | 4.26 | 8.11E-05 |
| GTPBP4     | 5.75 | 4.34 | 8.21E-05 |
| CDC123     | 5.75 | 4.3  | 8.52E-05 |
| RPS3A      | 5.74 | 3.62 | 8.52E-05 |
| TRAPPC3    | 5.74 | 3.27 | 8.52E-05 |
| RPL7       | 5.73 | 3.18 | 8.94E-05 |
| SARS       | 5.72 | 3.84 | 8.94E-05 |
| NCBP2      | 5.72 | 4.09 | 9.15E-05 |
| RGPD8      | 5.71 | 3.11 | 9.25E-05 |
| BIRC5      | 5.7  | 3.7  | 9.67E-05 |
| ARL2       | 5.69 | 3.37 | 9.88E-05 |
| NOL10      | 5.69 | 3.76 | 9.88E-05 |
| HSPE1-MOB4 | 5.68 | 3.42 | 9.88E-05 |
| LRPPRC     | 5.68 | 4.06 | 1.03E-04 |
| EEF2       | 5.66 | 3.78 | 1.06E-04 |

|         |      |      |          |
|---------|------|------|----------|
| PELP1   | 5.77 | 3.47 | 7.80E-05 |
| GEMIN5  | 5.76 | 3.68 | 7.80E-05 |
| ALG2    | 5.74 | 3.64 | 8.52E-05 |
| PPP1R2  | 5.71 | 4.1  | 9.15E-05 |
| RFC3    | 5.71 | 3.82 | 9.36E-05 |
| GTF3A   | 5.71 | 3.77 | 9.36E-05 |
| COPS6   | 5.69 | 3.96 | 9.88E-05 |
| RPP40   | 5.67 | 3.44 | 1.03E-04 |
| THOC3   | 5.64 | 3.39 | 1.11E-04 |
| COQ4    | 5.63 | 3.25 | 1.11E-04 |
| PMPCA   | 5.63 | 3.61 | 1.12E-04 |
| NSF     | 5.62 | 3.64 | 1.19E-04 |
| DNAJC9  | 5.6  | 3.51 | 1.26E-04 |
| SOD1    | 5.6  | 3.81 | 1.26E-04 |
| FXN     | 5.59 | 3.97 | 1.27E-04 |
| EARS2   | 5.55 | 3.5  | 1.36E-04 |
| VPS25   | 5.55 | 3.97 | 1.37E-04 |
| SMG6    | 5.53 | 3.11 | 1.46E-04 |
| FBL     | 5.51 | 3.71 | 1.53E-04 |
| TXNL4A  | 5.5  | 3.58 | 1.56E-04 |
| ACTR1A  | 5.47 | 3.54 | 1.65E-04 |
| MRPL18  | 5.47 | 3.14 | 1.66E-04 |
| MVK     | 5.47 | 3.46 | 1.66E-04 |
| RPS4X   | 5.45 | 3.48 | 1.70E-04 |
| TBC1D3C | 5.44 | 3.25 | 1.77E-04 |
| ATP6V1F | 5.42 | 3.23 | 1.83E-04 |
| SNAPC1  | 5.39 | 3.22 | 1.91E-04 |
| CPSF4   | 5.38 | 3.42 | 1.98E-04 |
| NDUFAF3 | 5.37 | 3.62 | 2.00E-04 |
| TBC1D3H | 5.37 | 3.23 | 2.00E-04 |
| SRSF2   | 5.37 | 3.27 | 2.05E-04 |
| NDUFA8  | 5.34 | 3.56 | 2.23E-04 |
| NELFB   | 5.33 | 3.91 | 2.30E-04 |
| COX15   | 5.33 | 3.27 | 2.30E-04 |
| CDC123  | 5.33 | 3.32 | 2.32E-04 |
| RAE1    | 5.33 | 2.93 | 2.34E-04 |
| C1QBP   | 5.31 | 3.15 | 2.48E-04 |
| SF3B5   | 5.29 | 3.23 | 2.59E-04 |
| FNTB    | 5.29 | 3.56 | 2.61E-04 |
| TBC1D3G | 5.28 | 3.04 | 2.65E-04 |
| TBC1D3  | 5.28 | 3.04 | 2.65E-04 |
| RNPC3   | 5.27 | 3.63 | 2.74E-04 |
| FARS2   | 5.26 | 3.51 | 2.78E-04 |
| INTS3   | 5.23 | 3.6  | 2.95E-04 |
| ROMO1   | 5.22 | 3.57 | 2.98E-04 |
| NDUFB4  | 5.22 | 3.1  | 3.04E-04 |
| CHMP6   | 5.21 | 3.76 | 3.09E-04 |

|              |      |      |          |
|--------------|------|------|----------|
| EIF2B1       | 5.65 | 3.48 | 1.09E-04 |
| GEMIN5       | 5.64 | 3.35 | 1.10E-04 |
| DDX54        | 5.63 | 3.32 | 1.12E-04 |
| TARS         | 5.6  | 3.61 | 1.23E-04 |
| CCT5         | 5.58 | 3.53 | 1.29E-04 |
| SRP14        | 5.58 | 3.99 | 1.29E-04 |
| CRCP         | 5.58 | 3.45 | 1.30E-04 |
| PMPCA        | 5.56 | 3.25 | 1.34E-04 |
| POLR1C       | 5.55 | 4.63 | 1.35E-04 |
| POLD3        | 5.55 | 3.13 | 1.35E-04 |
| MRPL10       | 5.52 | 3.36 | 1.48E-04 |
| CDC23        | 5.52 | 3.51 | 1.50E-04 |
| DNAJC17      | 5.5  | 3.96 | 1.56E-04 |
| PHB2         | 5.49 | 3.58 | 1.57E-04 |
| MMS22L       | 5.48 | 3.5  | 1.59E-04 |
| NIIPA5       | 5.48 | 3.42 | 1.59E-04 |
| WDHD1        | 5.47 | 3.19 | 1.64E-04 |
| RPL17-C18orf | 5.46 | 3.24 | 1.66E-04 |
| CHMP6        | 5.44 | 3.77 | 1.77E-04 |
| MCM6         | 5.43 | 3.36 | 1.80E-04 |
| FBL          | 5.43 | 3.61 | 1.80E-04 |
| SARS2        | 5.43 | 3.02 | 1.82E-04 |
| AFG3L2       | 5.42 | 3.41 | 1.83E-04 |
| MRPL16       | 5.42 | 3.26 | 1.83E-04 |
| DCTN5        | 5.42 | 3.25 | 1.83E-04 |
| RSL1D1       | 5.38 | 3.21 | 1.98E-04 |
| AARS         | 5.38 | 3.41 | 1.99E-04 |
| POLR1A       | 5.37 | 3.2  | 2.00E-04 |
| ALG13        | 5.37 | 3.86 | 2.00E-04 |
| METTL16      | 5.36 | 3.16 | 2.06E-04 |
| SRSF2        | 5.36 | 3.36 | 2.11E-04 |
| CWC22        | 5.36 | 3    | 2.11E-04 |
| DBR1         | 5.36 | 4.21 | 2.11E-04 |
| EARS2        | 5.35 | 3.59 | 2.14E-04 |
| POLD1        | 5.35 | 3.04 | 2.20E-04 |
| HCFC1        | 5.33 | 3.77 | 2.31E-04 |
| SOD2         | 5.31 | 3.09 | 2.48E-04 |
| TRNT1        | 5.31 | 4.01 | 2.48E-04 |
| SAE1         | 5.3  | 3.35 | 2.51E-04 |
| GINS3        | 5.29 | 3.83 | 2.59E-04 |
| GFM1         | 5.29 | 3.31 | 2.61E-04 |
| ALDOA        | 5.29 | 3.11 | 2.62E-04 |
| NSF          | 5.27 | 3.21 | 2.68E-04 |
| COASY        | 5.26 | 3.28 | 2.79E-04 |
| PHF5A        | 5.26 | 3.04 | 2.84E-04 |
| XRCC6        | 5.25 | 3.31 | 2.87E-04 |
| POLR3H       | 5.25 | 4.33 | 2.91E-04 |

|         |      |      |          |
|---------|------|------|----------|
| TUBGCP2 | 5.18 | 3.47 | 3.28E-04 |
| PAXBP1  | 5.17 | 2.94 | 3.36E-04 |
| LARS2   | 5.16 | 3.14 | 3.43E-04 |
| POLR3A  | 5.15 | 3.12 | 3.58E-04 |
| CDK7    | 5.14 | 3.44 | 3.63E-04 |
| COG3    | 5.14 | 3.17 | 3.69E-04 |
| GINS2   | 5.14 | 3.3  | 3.72E-04 |
| PRKRA   | 5.13 | 3.6  | 3.77E-04 |
| DDX49   | 5.09 | 3.74 | 4.13E-04 |
| TIMM10  | 5.08 | 3.44 | 4.20E-04 |
| MRPL57  | 5.07 | 3.34 | 4.25E-04 |
| NDNL2   | 5.06 | 3.37 | 4.41E-04 |
| RBM4    | 5.05 | 3.11 | 4.58E-04 |
| HARS2   | 5.03 | 2.83 | 4.89E-04 |
| CCDC115 | 5.02 | 3.36 | 4.95E-04 |
| PET117  | 5.01 | 3.81 | 5.05E-04 |
| MRPL33  | 4.98 | 3.51 | 5.42E-04 |
| RPL9    | 4.94 | 3.5  | 5.95E-04 |
| PDCD2   | 4.94 | 3.58 | 6.01E-04 |
| RPAIN   | 4.94 | 3.06 | 6.01E-04 |
| RBM25   | 4.92 | 3.01 | 6.38E-04 |
| LUC7L3  | 4.89 | 3.31 | 6.83E-04 |
| EEF2    | 4.89 | 4.04 | 6.86E-04 |
| RPS15A  | 4.89 | 3.38 | 6.86E-04 |
| COPG1   | 4.89 | 3.37 | 6.87E-04 |
| ATP5E   | 4.89 | 2.98 | 6.93E-04 |
| SNAPC2  | 4.89 | 3.43 | 6.93E-04 |
| CCT3    | 4.88 | 2.77 | 6.95E-04 |
| PGK1    | 4.88 | 3.44 | 6.95E-04 |
| MYC     | 4.88 | 2.95 | 7.02E-04 |
| MRPL38  | 4.88 | 3.7  | 7.02E-04 |
| UTP15   | 4.87 | 2.9  | 7.05E-04 |
| EEF1A1  | 4.85 | 3.15 | 7.35E-04 |
| PSMG4   | 4.85 | 3.35 | 7.43E-04 |
| HYOU1   | 4.84 | 3.38 | 7.59E-04 |
| VBP1    | 4.84 | 3.48 | 7.61E-04 |
| RIC1    | 4.84 | 2.73 | 7.63E-04 |
| CCDC86  | 4.83 | 2.71 | 7.73E-04 |
| CDC7    | 4.83 | 2.79 | 7.73E-04 |
| TRAPPC8 | 4.83 | 3.65 | 7.77E-04 |
| PSMA3   | 4.82 | 2.62 | 7.88E-04 |
| RPS28   | 4.82 | 3.76 | 7.89E-04 |
| PFDN2   | 4.82 | 3.03 | 8.01E-04 |
| RAD9A   | 4.77 | 3.07 | 9.00E-04 |
| POLR1C  | 4.76 | 3.52 | 9.15E-04 |
| PDCD11  | 4.76 | 3.31 | 9.18E-04 |
| DNAJC17 | 4.74 | 3.35 | 9.55E-04 |

|         |      |      |          |
|---------|------|------|----------|
| UBA1    | 5.24 | 3.78 | 2.94E-04 |
| LETM1   | 5.24 | 3.82 | 2.94E-04 |
| SF3A1   | 5.23 | 3.52 | 2.94E-04 |
| RPTOR   | 5.23 | 3.27 | 2.95E-04 |
| NEDD8   | 5.23 | 3.03 | 2.95E-04 |
| EXOSC8  | 5.22 | 3.19 | 3.04E-04 |
| SDHB    | 5.22 | 3.38 | 3.04E-04 |
| UBE2N   | 5.22 | 3.65 | 3.04E-04 |
| KIF18A  | 5.21 | 3.51 | 3.04E-04 |
| RABGGTB | 5.2  | 3.4  | 3.11E-04 |
| MRPL28  | 5.2  | 3.1  | 3.11E-04 |
| CIAO1   | 5.2  | 3.64 | 3.20E-04 |
| TONSL   | 5.19 | 3.71 | 3.21E-04 |
| MLST8   | 5.19 | 3.05 | 3.27E-04 |
| PSMB6   | 5.19 | 2.96 | 3.27E-04 |
| MVK     | 5.18 | 3.27 | 3.28E-04 |
| IPO9    | 5.18 | 3.19 | 3.30E-04 |
| CDC45   | 5.18 | 2.93 | 3.33E-04 |
| DDX55   | 5.17 | 3.7  | 3.35E-04 |
| SNRNP25 | 5.17 | 3.76 | 3.35E-04 |
| PSMG4   | 5.17 | 3.52 | 3.35E-04 |
| FCF1    | 5.17 | 3.36 | 3.41E-04 |
| TTI1    | 5.16 | 2.89 | 3.42E-04 |
| RUVBL1  | 5.16 | 3.76 | 3.43E-04 |
| EIF1AX  | 5.15 | 3.7  | 3.62E-04 |
| ORAOV1  | 5.14 | 3.72 | 3.67E-04 |
| UBE2L3  | 5.14 | 3.19 | 3.69E-04 |
| CCT3    | 5.13 | 3.12 | 3.77E-04 |
| URB1    | 5.13 | 3.17 | 3.77E-04 |
| RBM22   | 5.13 | 2.78 | 3.84E-04 |
| MAK16   | 5.12 | 3.4  | 3.89E-04 |
| POLRMT  | 5.12 | 3.07 | 3.89E-04 |
| NOP2    | 5.12 | 3.07 | 3.94E-04 |
| HDAC3   | 5.11 | 3.2  | 3.96E-04 |
| RPAP1   | 5.11 | 3.73 | 3.96E-04 |
| OSGEP   | 5.11 | 3.45 | 3.97E-04 |
| TRMT112 | 5.1  | 3.7  | 4.02E-04 |
| ANKLE2  | 5.1  | 3.48 | 4.02E-04 |
| CCDC84  | 5.09 | 3.2  | 4.15E-04 |
| EIF3I   | 5.08 | 2.85 | 4.20E-04 |
| TEN1    | 5.06 | 3.19 | 4.41E-04 |
| PGK1    | 5.06 | 3.11 | 4.51E-04 |
| RPL31   | 5.04 | 3.12 | 4.66E-04 |
| LYRM4   | 5.04 | 3.37 | 4.78E-04 |
| LARS2   | 5.03 | 3.16 | 4.88E-04 |
| SNAPC5  | 5.03 | 3.2  | 4.92E-04 |
| RPL34   | 5.02 | 2.99 | 5.02E-04 |

|            |      |      |          |
|------------|------|------|----------|
| RPL19      | 4.73 | 2.92 | 9.78E-04 |
| RPL35      | 4.72 | 2.92 | 9.86E-04 |
| CENPW      | 4.71 | 2.94 | 1.01E-03 |
| FAM96B     | 4.71 | 3.25 | 1.02E-03 |
| DHX33      | 4.71 | 3.39 | 1.02E-03 |
| HEATR1     | 4.7  | 2.99 | 1.03E-03 |
| MTPAP      | 4.7  | 3.08 | 1.03E-03 |
| HNRNPM     | 4.69 | 3.66 | 1.06E-03 |
| XRCC3      | 4.69 | 3.3  | 1.07E-03 |
| YARS       | 4.68 | 2.8  | 1.07E-03 |
| RNGTT      | 4.68 | 3.26 | 1.07E-03 |
| POP5       | 4.68 | 3.53 | 1.08E-03 |
| DHX37      | 4.67 | 3.13 | 1.11E-03 |
| SAE1       | 4.67 | 3.4  | 1.11E-03 |
| NDUFB11    | 4.66 | 2.94 | 1.14E-03 |
| CAP1       | 4.65 | 3.3  | 1.16E-03 |
| MIPEP      | 4.65 | 3.01 | 1.16E-03 |
| NDUFB10    | 4.65 | 3.23 | 1.16E-03 |
| NDUFAF1    | 4.64 | 3.04 | 1.19E-03 |
| CHAF1B     | 4.64 | 3.2  | 1.20E-03 |
| SBDS       | 4.63 | 3.56 | 1.21E-03 |
| NOP9       | 4.63 | 3.6  | 1.22E-03 |
| SMU1       | 4.62 | 2.94 | 1.24E-03 |
| CYCS       | 4.61 | 3.11 | 1.29E-03 |
| UQCRC2     | 4.61 | 3.05 | 1.29E-03 |
| MCM4       | 4.61 | 2.96 | 1.29E-03 |
| SRBD1      | 4.6  | 2.74 | 1.30E-03 |
| RUVBL2     | 4.6  | 2.71 | 1.31E-03 |
| HSPE1-MOB4 | 4.6  | 2.98 | 1.31E-03 |
| CTCF       | 4.6  | 3.66 | 1.32E-03 |
| EMC3       | 4.56 | 2.75 | 1.43E-03 |
| POLR3H     | 4.56 | 3.71 | 1.44E-03 |
| MRPS23     | 4.55 | 3.03 | 1.46E-03 |
| TKT        | 4.55 | 2.77 | 1.47E-03 |
| DCTN5      | 4.54 | 2.8  | 1.48E-03 |
| TUBB       | 4.54 | 2.91 | 1.48E-03 |
| C21orf59   | 4.52 | 3.2  | 1.57E-03 |
| BOP1       | 4.52 | 3.12 | 1.59E-03 |
| POLD3      | 4.51 | 2.65 | 1.60E-03 |
| C3orf17    | 4.51 | 3.16 | 1.60E-03 |
| H2AFX      | 4.51 | 3.16 | 1.61E-03 |
| PSMB6      | 4.51 | 2.57 | 1.62E-03 |
| NDUFB6     | 4.5  | 3.8  | 1.66E-03 |
| LRR1       | 4.49 | 3.08 | 1.67E-03 |
| GNL3       | 4.49 | 3.11 | 1.69E-03 |
| GINS1      | 4.49 | 3.33 | 1.69E-03 |
| BRIX1      | 4.48 | 2.8  | 1.72E-03 |

|          |      |      |          |
|----------|------|------|----------|
| PKM      | 5.02 | 3.23 | 5.05E-04 |
| MCM3     | 5.01 | 3.78 | 5.05E-04 |
| CYCS     | 5.01 | 2.9  | 5.14E-04 |
| DDX10    | 5.01 | 3.39 | 5.15E-04 |
| ATP6V1B2 | 5.01 | 3.8  | 5.18E-04 |
| SFSWAP   | 5    | 3.33 | 5.24E-04 |
| PSMA5    | 4.99 | 2.73 | 5.26E-04 |
| PRMT1    | 4.99 | 3.68 | 5.28E-04 |
| SF3A2    | 4.97 | 2.84 | 5.47E-04 |
| RABGGTA  | 4.97 | 3.54 | 5.48E-04 |
| BUB1B    | 4.97 | 2.93 | 5.49E-04 |
| PPA1     | 4.96 | 3.29 | 5.76E-04 |
| PSMA1    | 4.95 | 3.03 | 5.80E-04 |
| MYC      | 4.95 | 2.9  | 5.83E-04 |
| MRPL21   | 4.95 | 2.96 | 5.93E-04 |
| RPL23    | 4.95 | 3.15 | 5.94E-04 |
| C3orf17  | 4.94 | 2.85 | 5.99E-04 |
| NPLOC4   | 4.94 | 3.27 | 6.07E-04 |
| GTF2A2   | 4.92 | 3.36 | 6.26E-04 |
| INTS3    | 4.92 | 3.72 | 6.30E-04 |
| SNRPG    | 4.91 | 3.38 | 6.39E-04 |
| CDCA8    | 4.91 | 3.16 | 6.39E-04 |
| FARSB    | 4.9  | 4.43 | 6.66E-04 |
| MRPS23   | 4.9  | 3.52 | 6.66E-04 |
| SPATA5L1 | 4.9  | 3.19 | 6.74E-04 |
| SF1      | 4.9  | 2.9  | 6.76E-04 |
| MRPL39   | 4.89 | 3.53 | 6.87E-04 |
| THOC3    | 4.89 | 3.31 | 6.93E-04 |
| RBBP5    | 4.88 | 3.27 | 6.95E-04 |
| DDB1     | 4.88 | 3.05 | 6.95E-04 |
| RPL14    | 4.88 | 3.17 | 7.03E-04 |
| RPL24    | 4.88 | 2.89 | 7.04E-04 |
| E2F3     | 4.88 | 2.91 | 7.04E-04 |
| PIK3C3   | 4.87 | 2.85 | 7.06E-04 |
| DHPS     | 4.87 | 3.06 | 7.16E-04 |
| CCT2     | 4.86 | 3.24 | 7.22E-04 |
| METTL14  | 4.85 | 2.91 | 7.34E-04 |
| NVL      | 4.85 | 3.28 | 7.43E-04 |
| CCT4     | 4.85 | 2.95 | 7.44E-04 |
| TOP3A    | 4.84 | 2.87 | 7.45E-04 |
| RPL27A   | 4.84 | 3.27 | 7.60E-04 |
| NMD3     | 4.84 | 3.05 | 7.61E-04 |
| VCP      | 4.83 | 2.85 | 7.71E-04 |
| IARS2    | 4.83 | 4.04 | 7.73E-04 |
| CENPN    | 4.83 | 2.75 | 7.73E-04 |
| OBFC1    | 4.83 | 3.33 | 7.73E-04 |
| DDX47    | 4.83 | 3.04 | 7.75E-04 |

|          |      |      |          |
|----------|------|------|----------|
| DTYMK    | 4.48 | 3.37 | 1.72E-03 |
| LRPPRC   | 4.48 | 2.68 | 1.73E-03 |
| DERL2    | 4.47 | 2.73 | 1.74E-03 |
| INTS7    | 4.47 | 3.09 | 1.77E-03 |
| SDHB     | 4.47 | 3.41 | 1.77E-03 |
| TARDBP   | 4.47 | 2.62 | 1.78E-03 |
| BUD31    | 4.46 | 2.79 | 1.82E-03 |
| NUP88    | 4.45 | 2.87 | 1.85E-03 |
| PPCDC    | 4.45 | 2.79 | 1.86E-03 |
| RPL11    | 4.44 | 3.19 | 1.87E-03 |
| DDX56    | 4.44 | 2.67 | 1.88E-03 |
| RBM33    | 4.44 | 2.73 | 1.91E-03 |
| EIF2B3   | 4.44 | 2.86 | 1.91E-03 |
| UMPS     | 4.43 | 2.91 | 1.92E-03 |
| NHLRC2   | 4.43 | 3.03 | 1.93E-03 |
| NCAPG2   | 4.43 | 2.39 | 1.95E-03 |
| RBBP5    | 4.42 | 2.88 | 1.97E-03 |
| TARS2    | 4.42 | 3.07 | 1.99E-03 |
| NDUFAB1  | 4.41 | 2.84 | 2.03E-03 |
| ORAOV1   | 4.41 | 2.82 | 2.03E-03 |
| ATP6VOC  | 4.4  | 3.38 | 2.06E-03 |
| AARS     | 4.4  | 3.21 | 2.06E-03 |
| FAU      | 4.4  | 2.63 | 2.07E-03 |
| EPRS     | 4.38 | 2.66 | 2.14E-03 |
| RUVBL1   | 4.38 | 3.49 | 2.16E-03 |
| NAE1     | 4.38 | 2.81 | 2.17E-03 |
| COA7     | 4.36 | 2.72 | 2.26E-03 |
| MRPS31   | 4.36 | 3.06 | 2.26E-03 |
| EIF1AX   | 4.36 | 2.8  | 2.28E-03 |
| GLRX5    | 4.35 | 2.97 | 2.29E-03 |
| PDRG1    | 4.35 | 2.92 | 2.30E-03 |
| YRDC     | 4.35 | 2.86 | 2.30E-03 |
| FTSJ2    | 4.35 | 2.9  | 2.32E-03 |
| UBE2N    | 4.32 | 2.88 | 2.47E-03 |
| MAK16    | 4.32 | 2.65 | 2.49E-03 |
| UBA1     | 4.32 | 2.72 | 2.50E-03 |
| MRPL43   | 4.32 | 2.78 | 2.51E-03 |
| SPATA5   | 4.3  | 2.99 | 2.60E-03 |
| KANSL3   | 4.3  | 2.54 | 2.61E-03 |
| MINOS1   | 4.3  | 2.99 | 2.64E-03 |
| MED30    | 4.29 | 2.98 | 2.65E-03 |
| POLR3E   | 4.29 | 3.26 | 2.66E-03 |
| RPL4     | 4.29 | 2.79 | 2.70E-03 |
| MRPL15   | 4.28 | 2.81 | 2.71E-03 |
| PAFAH1B1 | 4.28 | 2.89 | 2.75E-03 |
| KIAA0391 | 4.27 | 2.74 | 2.76E-03 |
| MED19    | 4.27 | 2.57 | 2.77E-03 |

|           |      |      |          |
|-----------|------|------|----------|
| MRGBP     | 4.82 | 3.19 | 7.91E-04 |
| CDC42     | 4.82 | 3.43 | 8.00E-04 |
| UBA2      | 4.82 | 2.67 | 8.01E-04 |
| PPP4C     | 4.81 | 3.2  | 8.05E-04 |
| C10orf2   | 4.81 | 2.89 | 8.10E-04 |
| MRPL20    | 4.81 | 2.97 | 8.14E-04 |
| SMC3      | 4.81 | 3.15 | 8.14E-04 |
| PSMD14    | 4.8  | 2.71 | 8.22E-04 |
| RPS13     | 4.8  | 3.58 | 8.31E-04 |
| C21orf59  | 4.8  | 3.3  | 8.31E-04 |
| SART3     | 4.8  | 2.87 | 8.38E-04 |
| CPSF3L    | 4.79 | 3.31 | 8.42E-04 |
| ERH       | 4.78 | 3.48 | 8.68E-04 |
| HSPD1     | 4.78 | 3.27 | 8.84E-04 |
| GNB2L1    | 4.77 | 3.13 | 8.88E-04 |
| SYS1      | 4.76 | 3.1  | 9.13E-04 |
| RPLP0     | 4.76 | 3.24 | 9.15E-04 |
| CTCF      | 4.76 | 3.45 | 9.15E-04 |
| RACGAP1   | 4.76 | 3.28 | 9.18E-04 |
| EIF2B3    | 4.76 | 2.94 | 9.20E-04 |
| MPHOSPH10 | 4.75 | 2.88 | 9.23E-04 |
| UBE2I     | 4.75 | 3.43 | 9.23E-04 |
| TOMM22    | 4.75 | 2.86 | 9.23E-04 |
| SDHC      | 4.75 | 2.96 | 9.40E-04 |
| SUPV3L1   | 4.74 | 3.13 | 9.55E-04 |
| MMS19     | 4.74 | 3.07 | 9.66E-04 |
| SUPT16H   | 4.73 | 2.77 | 9.68E-04 |
| C1QBP     | 4.73 | 2.72 | 9.77E-04 |
| RPS8      | 4.73 | 2.77 | 9.78E-04 |
| MRPS6     | 4.73 | 2.74 | 9.78E-04 |
| DDX11     | 4.73 | 2.76 | 9.84E-04 |
| TBCB      | 4.72 | 2.92 | 9.91E-04 |
| PSMA6     | 4.72 | 2.74 | 1.00E-03 |
| RPL18     | 4.71 | 3.03 | 1.01E-03 |
| RPL7A     | 4.71 | 2.67 | 1.01E-03 |
| CDIPT     | 4.71 | 3.39 | 1.02E-03 |
| PGD       | 4.71 | 3.06 | 1.02E-03 |
| PAM16     | 4.71 | 3.14 | 1.03E-03 |
| PDRG1     | 4.7  | 3.32 | 1.03E-03 |
| KRR1      | 4.7  | 3.53 | 1.03E-03 |
| RPL9      | 4.7  | 3.47 | 1.03E-03 |
| PRPF19    | 4.69 | 3.34 | 1.06E-03 |
| MRPL49    | 4.68 | 2.75 | 1.07E-03 |
| UTP15     | 4.68 | 2.75 | 1.09E-03 |
| PDCD11    | 4.67 | 3.34 | 1.10E-03 |
| EEF1G     | 4.67 | 3.52 | 1.10E-03 |
| TRAPPC1   | 4.66 | 2.92 | 1.14E-03 |

|          |      |      |          |
|----------|------|------|----------|
| PFDN1    | 4.27 | 2.9  | 2.79E-03 |
| CLNS1A   | 4.27 | 2.8  | 2.79E-03 |
| MASTL    | 4.27 | 2.96 | 2.81E-03 |
| PRPF38B  | 4.26 | 2.99 | 2.83E-03 |
| TARS     | 4.26 | 2.89 | 2.86E-03 |
| ARMC7    | 4.26 | 2.99 | 2.86E-03 |
| TRMT112  | 4.26 | 3.16 | 2.87E-03 |
| TIMELESS | 4.26 | 2.58 | 2.87E-03 |
| RPUSD3   | 4.25 | 2.93 | 2.91E-03 |
| TCP1     | 4.25 | 2.83 | 2.95E-03 |
| MRPS34   | 4.24 | 3.26 | 2.98E-03 |
| SNRPD1   | 4.24 | 2.56 | 2.98E-03 |
| DDX55    | 4.24 | 2.45 | 3.01E-03 |
| RNF4     | 4.23 | 2.31 | 3.05E-03 |
| GPN2     | 4.23 | 3.19 | 3.06E-03 |
| CCT4     | 4.22 | 3.01 | 3.12E-03 |
| MTG2     | 4.21 | 2.78 | 3.18E-03 |
| MRPL10   | 4.21 | 3.01 | 3.19E-03 |
| NKAP     | 4.21 | 2.74 | 3.21E-03 |
| USP9X    | 4.19 | 2.58 | 3.31E-03 |
| TOP2A    | 4.19 | 2.38 | 3.32E-03 |
| RABIF    | 4.18 | 2.29 | 3.39E-03 |
| COASY    | 4.18 | 3.23 | 3.39E-03 |
| PCNA     | 4.18 | 3.38 | 3.39E-03 |
| DDX10    | 4.18 | 2.77 | 3.41E-03 |
| PRPF3    | 4.18 | 2.48 | 3.42E-03 |
| CAPZB    | 4.18 | 2.75 | 3.43E-03 |
| NUP43    | 4.18 | 2.86 | 3.44E-03 |
| CCNH     | 4.18 | 3.06 | 3.44E-03 |
| CDK1     | 4.17 | 2.6  | 3.51E-03 |
| GARS     | 4.17 | 2.57 | 3.52E-03 |
| TUBG1    | 4.17 | 2.7  | 3.53E-03 |
| ATL2     | 4.16 | 2.36 | 3.59E-03 |
| DHDDS    | 4.16 | 2.59 | 3.61E-03 |
| TBC1D3F  | 4.15 | 2.46 | 3.70E-03 |
| CDC37    | 4.14 | 3.03 | 3.74E-03 |
| RPL27    | 4.14 | 2.55 | 3.76E-03 |
| RPS8     | 4.14 | 2.99 | 3.79E-03 |
| RPL36    | 4.13 | 3.02 | 3.79E-03 |
| C9orf114 | 4.13 | 2.76 | 3.82E-03 |
| EXOSC1   | 4.13 | 2.6  | 3.87E-03 |
| RABGGTA  | 4.13 | 2.73 | 3.89E-03 |
| PSTK     | 4.12 | 2.84 | 3.91E-03 |
| RPAP1    | 4.12 | 2.92 | 3.91E-03 |
| NDUFA2   | 4.12 | 2.36 | 3.92E-03 |
| ERAL1    | 4.11 | 2.64 | 4.03E-03 |
| MED11    | 4.11 | 2.6  | 4.05E-03 |

|        |      |      |          |
|--------|------|------|----------|
| CSE1L  | 4.65 | 2.9  | 1.17E-03 |
| PPWD1  | 4.65 | 3.25 | 1.18E-03 |
| RFC5   | 4.64 | 3.36 | 1.19E-03 |
| GRB2   | 4.64 | 2.63 | 1.20E-03 |
| HAUS7  | 4.64 | 3    | 1.20E-03 |
| MRPS25 | 4.63 | 2.99 | 1.21E-03 |
| EEF1A1 | 4.63 | 2.77 | 1.22E-03 |
| BNIP1  | 4.63 | 2.78 | 1.23E-03 |
| SNRPF  | 4.63 | 3.35 | 1.23E-03 |
| ELL    | 4.63 | 2.99 | 1.23E-03 |
| NUP133 | 4.61 | 2.69 | 1.29E-03 |
| XPO1   | 4.6  | 3.19 | 1.30E-03 |
| NFS1   | 4.6  | 3.49 | 1.30E-03 |
| PKMYT1 | 4.6  | 2.78 | 1.32E-03 |
| WDR43  | 4.6  | 2.97 | 1.32E-03 |
| SKP2   | 4.59 | 2.59 | 1.34E-03 |
| EIF2S1 | 4.59 | 2.92 | 1.34E-03 |
| ETF1   | 4.59 | 2.76 | 1.35E-03 |
| SNF8   | 4.59 | 2.87 | 1.35E-03 |
| WDR74  | 4.58 | 2.88 | 1.37E-03 |
| ACTL6A | 4.57 | 3.02 | 1.39E-03 |
| RPS20  | 4.57 | 3.04 | 1.41E-03 |
| RGPD6  | 4.57 | 2.58 | 1.41E-03 |
| RGPD5  | 4.57 | 2.58 | 1.41E-03 |
| SPC24  | 4.57 | 3.71 | 1.42E-03 |
| ECT2   | 4.56 | 3.02 | 1.42E-03 |
| PNPT1  | 4.56 | 3.03 | 1.42E-03 |
| UBA3   | 4.56 | 2.83 | 1.43E-03 |
| GOSR2  | 4.56 | 2.48 | 1.44E-03 |
| TXN    | 4.56 | 3.42 | 1.44E-03 |
| SNUPN  | 4.56 | 2.82 | 1.44E-03 |
| DENR   | 4.55 | 2.74 | 1.45E-03 |
| ING3   | 4.55 | 2.75 | 1.46E-03 |
| WRB    | 4.55 | 2.65 | 1.46E-03 |
| RPA1   | 4.54 | 2.92 | 1.48E-03 |
| DYNLL1 | 4.54 | 2.89 | 1.49E-03 |
| TSG101 | 4.54 | 2.65 | 1.50E-03 |
| PSMA3  | 4.53 | 2.89 | 1.52E-03 |
| MRPL53 | 4.53 | 2.94 | 1.52E-03 |
| CFAP20 | 4.53 | 2.53 | 1.53E-03 |
| SF3A3  | 4.53 | 2.85 | 1.53E-03 |
| PSMA7  | 4.52 | 2.93 | 1.55E-03 |
| ITGAV  | 4.52 | 3.12 | 1.57E-03 |
| NUDT21 | 4.52 | 2.95 | 1.57E-03 |
| RRM1   | 4.52 | 3    | 1.57E-03 |
| AARS2  | 4.51 | 2.76 | 1.61E-03 |
| RPS29  | 4.51 | 2.69 | 1.61E-03 |

|          |      |      |          |
|----------|------|------|----------|
| RPN2     | 4.11 | 3.26 | 4.05E-03 |
| WDR48    | 4.1  | 2.47 | 4.13E-03 |
| C12orf65 | 4.1  | 2.62 | 4.18E-03 |
| DNM1L    | 4.08 | 2.92 | 4.40E-03 |
| DDX42    | 4.07 | 2.59 | 4.44E-03 |
| GGPS1    | 4.07 | 2.37 | 4.45E-03 |
| SRP14    | 4.07 | 2.74 | 4.51E-03 |
| MYBBP1A  | 4.06 | 3.09 | 4.55E-03 |
| SKP2     | 4.06 | 2.36 | 4.55E-03 |
| KIF18A   | 4.06 | 2.78 | 4.57E-03 |
| UTP3     | 4.06 | 2.67 | 4.58E-03 |
| IARS2    | 4.05 | 3.18 | 4.64E-03 |
| ENO1     | 4.05 | 2.68 | 4.71E-03 |
| DONSON   | 4.04 | 2.6  | 4.80E-03 |
| HAUS7    | 4.03 | 3.07 | 4.94E-03 |
| CIAO1    | 4.03 | 2.89 | 4.95E-03 |
| POLG2    | 4.02 | 2.44 | 5.05E-03 |
| TANGO6   | 4.01 | 3.06 | 5.06E-03 |
| C10orf2  | 4.01 | 2.52 | 5.14E-03 |
| MRPL21   | 4    | 2.88 | 5.20E-03 |
| GNB2L1   | 4    | 3.32 | 5.25E-03 |
| MRPL2    | 4    | 2.31 | 5.27E-03 |
| ATP6V1G1 | 3.99 | 2.55 | 5.34E-03 |
| POLR3D   | 3.98 | 2.65 | 5.40E-03 |
| USP5     | 3.98 | 2.86 | 5.41E-03 |
| RAD51D   | 3.98 | 2.66 | 5.42E-03 |
| XPO1     | 3.97 | 2.77 | 5.43E-03 |
| RBBP4    | 3.97 | 2.67 | 5.46E-03 |
| PGS1     | 3.97 | 2.57 | 5.46E-03 |
| MRPS24   | 3.96 | 3.27 | 5.51E-03 |
| DHPS     | 3.96 | 3    | 5.54E-03 |
| ADSL     | 3.95 | 2.83 | 5.68E-03 |
| MRPL4    | 3.93 | 2.56 | 5.79E-03 |
| DDB1     | 3.93 | 3.1  | 5.79E-03 |
| SNRNP35  | 3.89 | 2.61 | 6.21E-03 |
| SEPHS2   | 3.88 | 3.12 | 6.26E-03 |
| ELP5     | 3.87 | 2.75 | 6.43E-03 |
| SMC1A    | 3.86 | 2.8  | 6.46E-03 |
| HIST2H3A | 3.85 | 2.37 | 6.64E-03 |
| HIST2H3C | 3.85 | 2.37 | 6.64E-03 |
| MVD      | 3.84 | 2.49 | 6.69E-03 |
| PRPF19   | 3.84 | 2.82 | 6.70E-03 |
| EEF1G    | 3.84 | 2.87 | 6.76E-03 |
| MRTO4    | 3.83 | 2.82 | 6.80E-03 |
| HAUS5    | 3.83 | 2.98 | 6.82E-03 |
| ANKRD49  | 3.83 | 2.36 | 6.84E-03 |
| ZNF131   | 3.83 | 2.88 | 6.86E-03 |

|          |      |      |          |
|----------|------|------|----------|
| CHMP4B   | 4.51 | 3.26 | 1.62E-03 |
| RPL19    | 4.51 | 2.82 | 1.62E-03 |
| NUP85    | 4.51 | 2.91 | 1.62E-03 |
| FAU      | 4.5  | 3.03 | 1.63E-03 |
| EEF2KMT  | 4.5  | 3.14 | 1.63E-03 |
| POP5     | 4.5  | 2.99 | 1.64E-03 |
| NAE1     | 4.49 | 2.95 | 1.67E-03 |
| NAA10    | 4.49 | 3.22 | 1.69E-03 |
| VRK1     | 4.48 | 2.9  | 1.70E-03 |
| DDX59    | 4.48 | 2.72 | 1.70E-03 |
| SNAPC1   | 4.48 | 2.78 | 1.72E-03 |
| SNRPE    | 4.48 | 3.29 | 1.73E-03 |
| ALG2     | 4.48 | 3.01 | 1.73E-03 |
| ATP6V1A  | 4.48 | 2.85 | 1.74E-03 |
| RPL3     | 4.47 | 2.85 | 1.74E-03 |
| NOL9     | 4.47 | 3.08 | 1.76E-03 |
| TSR2     | 4.47 | 3.09 | 1.76E-03 |
| RPS6     | 4.47 | 2.78 | 1.76E-03 |
| MASTL    | 4.47 | 3.25 | 1.78E-03 |
| RAN      | 4.46 | 2.62 | 1.78E-03 |
| NARS     | 4.46 | 2.64 | 1.80E-03 |
| PSMA2    | 4.46 | 2.79 | 1.81E-03 |
| DHX33    | 4.46 | 3    | 1.81E-03 |
| DCLRE1B  | 4.46 | 2.72 | 1.82E-03 |
| RPL5     | 4.45 | 3.18 | 1.82E-03 |
| RPS19    | 4.45 | 3.29 | 1.82E-03 |
| FAM96B   | 4.45 | 2.85 | 1.84E-03 |
| ICE2     | 4.45 | 2.6  | 1.86E-03 |
| GTF2E1   | 4.44 | 3.06 | 1.89E-03 |
| TIMM13   | 4.44 | 2.44 | 1.89E-03 |
| LSM3     | 4.44 | 3.23 | 1.90E-03 |
| SRSF7    | 4.44 | 3.37 | 1.91E-03 |
| SEC13    | 4.43 | 2.62 | 1.93E-03 |
| MRPL22   | 4.43 | 2.7  | 1.93E-03 |
| SPCS3    | 4.43 | 3.28 | 1.94E-03 |
| DDX49    | 4.43 | 2.85 | 1.95E-03 |
| SRBD1    | 4.41 | 3.39 | 2.00E-03 |
| SRSF1    | 4.41 | 2.54 | 2.02E-03 |
| KIAA0391 | 4.4  | 2.95 | 2.05E-03 |
| POLE     | 4.4  | 3.03 | 2.05E-03 |
| TIMM10   | 4.4  | 3.03 | 2.07E-03 |
| CDK7     | 4.39 | 3.6  | 2.08E-03 |
| TUBGCP5  | 4.39 | 2.54 | 2.08E-03 |
| WDR61    | 4.39 | 2.88 | 2.10E-03 |
| IMP4     | 4.39 | 2.74 | 2.10E-03 |
| NPIPA2   | 4.39 | 3.17 | 2.12E-03 |
| NPIPA1   | 4.39 | 3.17 | 2.12E-03 |

|          |      |      |          |
|----------|------|------|----------|
| SHQ1     | 3.82 | 2.43 | 6.93E-03 |
| TBCB     | 3.81 | 2.89 | 7.04E-03 |
| NUDC     | 3.8  | 2.48 | 7.24E-03 |
| RPL12    | 3.79 | 2.77 | 7.27E-03 |
| NMT1     | 3.79 | 3.12 | 7.32E-03 |
| GNB2     | 3.79 | 2.44 | 7.36E-03 |
| GTPBP4   | 3.78 | 3.13 | 7.40E-03 |
| DDOST    | 3.78 | 2.77 | 7.40E-03 |
| RARS2    | 3.78 | 2.78 | 7.44E-03 |
| RPP21    | 3.78 | 2.57 | 7.44E-03 |
| PLA2G10  | 3.76 | 2.51 | 7.74E-03 |
| NDUFA1   | 3.75 | 2.47 | 7.87E-03 |
| AK6      | 3.75 | 2.88 | 7.88E-03 |
| EP400    | 3.75 | 2.4  | 7.92E-03 |
| MRPL23   | 3.74 | 2.65 | 7.93E-03 |
| SF3A2    | 3.74 | 2.31 | 8.06E-03 |
| ACTR2    | 3.74 | 2.85 | 8.06E-03 |
| TELO2    | 3.73 | 2.31 | 8.21E-03 |
| SLC52A1  | 3.73 | 2.58 | 8.23E-03 |
| GTF2H1   | 3.71 | 2.69 | 8.40E-03 |
| MCM6     | 3.71 | 2.43 | 8.44E-03 |
| KPNB1    | 3.71 | 2.47 | 8.46E-03 |
| RRS1     | 3.7  | 2.84 | 8.57E-03 |
| IGBP1    | 3.69 | 2.64 | 8.85E-03 |
| TIMM13   | 3.69 | 2.44 | 8.86E-03 |
| UQCRFS1  | 3.68 | 2.33 | 8.94E-03 |
| NOP58    | 3.68 | 2.32 | 8.97E-03 |
| PAM16    | 3.68 | 2.51 | 9.01E-03 |
| MIS18A   | 3.67 | 2.83 | 9.04E-03 |
| CUL1     | 3.67 | 2.61 | 9.04E-03 |
| TRIT1    | 3.67 | 2.68 | 9.16E-03 |
| MED6     | 3.66 | 2.47 | 9.28E-03 |
| PRMT5    | 3.65 | 2.78 | 9.44E-03 |
| URB1     | 3.64 | 2.79 | 9.66E-03 |
| IMP3     | 3.64 | 2.86 | 9.70E-03 |
| MRPL16   | 3.64 | 2.92 | 9.76E-03 |
| ATP6V1A  | 3.63 | 2.82 | 9.81E-03 |
| BCLAF1   | 3.63 | 2.3  | 9.92E-03 |
| TRIAP1   | 3.62 | 2.65 | 9.98E-03 |
| HSD17B10 | 3.62 | 2.34 | 1.01E-02 |
| UQCC2    | 3.6  | 2.65 | 1.05E-02 |
| LANCL2   | 3.59 | 2.27 | 1.06E-02 |
| CSNK2B   | 3.59 | 2.32 | 1.07E-02 |
| RMI1     | 3.58 | 2.57 | 1.08E-02 |
| NOL10    | 3.58 | 2.76 | 1.09E-02 |
| COX17    | 3.57 | 2.25 | 1.10E-02 |
| ALYREF   | 3.57 | 2.26 | 1.12E-02 |



|        |      |      |          |
|--------|------|------|----------|
| NPIPA3 | 4.39 | 3.17 | 2.12E-03 |
| KANSL3 | 4.38 | 2.39 | 2.17E-03 |
| NOP10  | 4.37 | 2.5  | 2.19E-03 |
| CDC37  | 4.37 | 2.98 | 2.20E-03 |
| RPL17  | 4.37 | 2.79 | 2.21E-03 |
| HUS1   | 4.37 | 2.8  | 2.21E-03 |
| RPL35A | 4.36 | 3.05 | 2.23E-03 |
| SMG1   | 4.36 | 2.73 | 2.24E-03 |
| MDN1   | 4.36 | 3.2  | 2.24E-03 |
| PGAM1  | 4.36 | 2.51 | 2.25E-03 |
| GTF2B  | 4.36 | 3.02 | 2.28E-03 |
| XRN2   | 4.36 | 2.82 | 2.28E-03 |
| DAD1   | 4.35 | 3.57 | 2.30E-03 |
| ACTR10 | 4.35 | 2.59 | 2.30E-03 |
| PRMT5  | 4.35 | 3.26 | 2.30E-03 |
| RPL6   | 4.35 | 3.62 | 2.30E-03 |
| KPNB1  | 4.35 | 2.75 | 2.32E-03 |
| TRRAP  | 4.35 | 2.62 | 2.34E-03 |
| ATP2A2 | 4.34 | 3.41 | 2.36E-03 |
| OXSM   | 4.34 | 2.46 | 2.37E-03 |
| RRP12  | 4.34 | 2.78 | 2.38E-03 |
| RPS7   | 4.33 | 2.55 | 2.39E-03 |
| MED11  | 4.33 | 3.15 | 2.40E-03 |
| GNB1L  | 4.33 | 2.64 | 2.40E-03 |
| FEN1   | 4.33 | 2.35 | 2.43E-03 |
| EIF1AD | 4.32 | 3.14 | 2.46E-03 |
| CARS   | 4.32 | 3.11 | 2.46E-03 |
| POLE2  | 4.32 | 2.7  | 2.50E-03 |
| MCM7   | 4.32 | 2.85 | 2.51E-03 |
| RPS16  | 4.31 | 2.62 | 2.55E-03 |

|          |      |      |          |
|----------|------|------|----------|
| PSMD7    | 3.56 | 2.64 | 1.12E-02 |
| TBCA     | 3.56 | 3.36 | 1.14E-02 |
| CPSF6    | 3.55 | 2.48 | 1.15E-02 |
| ATP5I    | 3.55 | 2.68 | 1.15E-02 |
| HJURP    | 3.55 | 2.25 | 1.15E-02 |
| ZRSR2    | 3.55 | 2.58 | 1.16E-02 |
| PPIL4    | 3.55 | 2.49 | 1.16E-02 |
| EIF2S1   | 3.54 | 2.58 | 1.17E-02 |
| HAUS1    | 3.54 | 2.84 | 1.18E-02 |
| NFRKB    | 3.54 | 2.41 | 1.19E-02 |
| BIRC6    | 3.54 | 2.58 | 1.19E-02 |
| PPP1R12A | 3.53 | 2.36 | 1.19E-02 |
| DCTN3    | 3.53 | 2.55 | 1.20E-02 |
| EEF2KMT  | 3.52 | 2.68 | 1.23E-02 |
| NAA10    | 3.52 | 2.91 | 1.24E-02 |
| OXSM     | 3.51 | 2.19 | 1.25E-02 |
| RPS19    | 3.51 | 2.82 | 1.26E-02 |
| NOL6     | 3.5  | 2.56 | 1.28E-02 |
| SEPSECS  | 3.49 | 2.83 | 1.30E-02 |
| CCDC51   | 3.48 | 2.46 | 1.32E-02 |
| RCC1     | 3.48 | 2.7  | 1.34E-02 |
| TTF2     | 3.48 | 2.34 | 1.35E-02 |
| SETD1A   | 3.47 | 2.44 | 1.36E-02 |
| SNRNP27  | 3.47 | 2.22 | 1.36E-02 |
| MCM3     | 3.47 | 2.77 | 1.37E-02 |
| TXN      | 3.47 | 2.34 | 1.37E-02 |
| RPS20    | 3.46 | 2.62 | 1.39E-02 |
| MCMBP    | 3.46 | 2.21 | 1.40E-02 |
| DAD1     | 3.45 | 2.9  | 1.41E-02 |
| WDR43    | 3.45 | 2.81 | 1.43E-02 |



**Table S2. Ubiquitination related hits and their scores in the primary screen analysis.**

**BT-549**

| <b>Gene Symbol</b> | <b>STARS Score</b> | <b>Average Score</b> | <b>p-value</b> |
|--------------------|--------------------|----------------------|----------------|
| PSMD4              | 6.8                | 4.2                  | 1.04E-05       |
| UBA1               | 5.2                | 3.8                  | 2.95E-04       |
| NEDD8              | 5.2                | 3.0                  | 2.95E-04       |
| PSMB6              | 5.2                | 3.0                  | 3.27E-04       |
| PSMA5              | 5.0                | 2.7                  | 5.26E-04       |
| PSMA1              | 5.0                | 3.0                  | 5.80E-04       |
| UBA2               | 4.8                | 2.7                  | 8.01E-04       |
| PSMD14             | 4.8                | 2.7                  | 8.22E-04       |
| PSMA6              | 4.7                | 2.7                  | 1.00E-03       |
| UBA3               | 4.6                | 2.8                  | 1.43E-03       |
| PSMA3              | 4.5                | 2.9                  | 1.51E-03       |
| PSMA7              | 4.5                | 2.9                  | 1.54E-03       |
| PSMA2              | 4.5                | 2.8                  | 1.80E-03       |

**MDA-MB-468**

| <b>Gene Symbol</b> | <b>STARS Score</b> | <b>Average Score</b> | <b>p-value</b> |
|--------------------|--------------------|----------------------|----------------|
| PSMA3              | 4.82               | 2.6                  | 7.88E-04       |
| PSMB6              | 4.51               | 2.6                  | 1.61E-03       |
| UBA1               | 4.32               | 2.7                  | 2.50E-03       |
| RNF4               | 4.23               | 2.3                  | 3.05E-03       |
| USP9X              | 4.19               | 2.6                  | 3.31E-03       |
| USP5               | 3.98               | 2.9                  | 5.41E-03       |
| PSMD7              | 3.56               | 2.6                  | 1.12E-02       |

**Table S3. UBA1 and ubiquitination related genes and their CERES scores in TNBC CRISPR knock out cell lines derived from DepMap portal.**

| Genes  | Cell lines |        |         |        |       |       |            |            |         |       |            |            |       |          |
|--------|------------|--------|---------|--------|-------|-------|------------|------------|---------|-------|------------|------------|-------|----------|
|        | Hs578T     | CAL120 | HCC1937 | DU4475 | HCC38 | BT549 | MDA-MB-436 | MDA-MB-157 | HCC1806 | HCC70 | MDA-MB-231 | MDA-MB-468 | CAL51 | SUM149PT |
| UBA1   | -2.27      | -2.01  | -2.26   | -2.21  | -2.28 | -2.33 | -2.02      | -1.73      | -2.07   | -2.25 | -2.04      | -2.08      | -2.26 | -1.68    |
| UBA2   | -0.83      | -0.65  | -1.06   | -1.00  | -0.73 | -0.87 | -1.01      | -1.11      | -1.35   | -0.90 | -1.26      | -1.42      | -1.17 | -1.00    |
| UBA3   | -0.71      | -0.82  | -0.71   | -1.32  | -0.80 | -1.10 | -0.56      | -0.89      | -1.10   | -0.62 | -0.69      | -0.77      | -1.02 | -0.77    |
| NEDD8  | -1.52      | -2.16  | -2.00   | -1.00  | -1.72 | -1.74 | -1.63      | -2.21      | -1.92   | -1.90 | -1.74      | -1.75      | -1.47 | -1.80    |
| PSMD4  | -1.74      | -1.67  | -1.46   | -1.33  | -2.07 | -1.60 | -1.14      | -1.84      | -1.76   | -1.32 | -1.41      | -1.55      | -1.28 | -0.84    |
| PSMB6  | -1.95      | -1.58  | -1.52   | -2.33  | -1.55 | -1.44 | -1.76      | -0.49      | -1.16   | -0.30 | -1.25      | -1.12      | -1.74 | -0.97    |
| PSMA1  | -2.23      | -2.41  | -2.28   | -1.98  | -2.23 | -2.41 | -2.44      | -2.62      | -2.18   | -2.10 | -2.27      | -2.19      | -2.15 | -2.19    |
| PSMD14 | -1.75      | -1.70  | -2.05   | -2.14  | -1.92 | -1.75 | -1.93      | -2.13      | -1.82   | -2.25 | -1.71      | -1.86      | -1.39 | -1.07    |
| PSMA6  | -2.33      | -2.49  | -2.53   | -2.41  | -2.34 | -2.37 | -2.39      | -2.53      | -2.35   | -2.31 | -2.40      | -2.35      | -2.36 | -1.97    |
| PSMA3  | -2.32      | -2.47  | -2.46   | -2.46  | -1.99 | -2.33 | -2.36      | -2.56      | -2.09   | -2.29 | -2.33      | -2.22      | -2.20 | -2.31    |
| PSMA7  | -2.23      | -2.12  | -2.16   | -2.13  | -2.12 | -1.88 | -2.08      | -1.77      | -1.91   | -2.29 | -2.15      | -2.11      | -1.99 | -1.96    |
| PSMD7  | -1.96      | -1.75  | -1.91   | -1.66  | -1.85 | -1.83 | -1.96      | -1.80      | -1.79   | -1.55 | -1.62      | -1.64      | -1.32 | -1.63    |
| RNF4   | -0.63      | -0.18  | -0.53   | -1.06  | -0.99 | -0.16 | -0.49      | -0.98      | -0.95   | -0.44 | -0.35      | -0.78      | -0.95 | -0.48    |
| USP9X  | -0.04      | -0.39  | -0.68   | -0.88  | -0.73 | -0.38 | -0.68      | -0.27      | -0.63   | -0.20 | -0.12      | -0.36      | -0.05 | -0.77    |
| USP5   | -1.64      | -1.94  | -1.66   | -1.80  | -2.09 | -1.95 | -1.60      | -1.91      | -1.97   | -1.33 | -1.64      | -1.89      | -1.80 | -2.15    |

**Table S4: Details of VCU PDX models.**

| Description | Age | Diagnosis                                                                |
|-------------|-----|--------------------------------------------------------------------------|
| VCU-BC-01   | 59  | Invasive Ductal Carcinoma Grade III ER-, PR-, Her2Neu- (Triple negative) |
| VCU-BC-02   | 52  | Invasive ductal carcinoma, ER-, PR-, HER2Neu- (Triple Negative)          |
| VCU-BC-03   | 53  | Invasive ductal carcinoma with necrosis, ER-, PR-, HER2Neu-              |

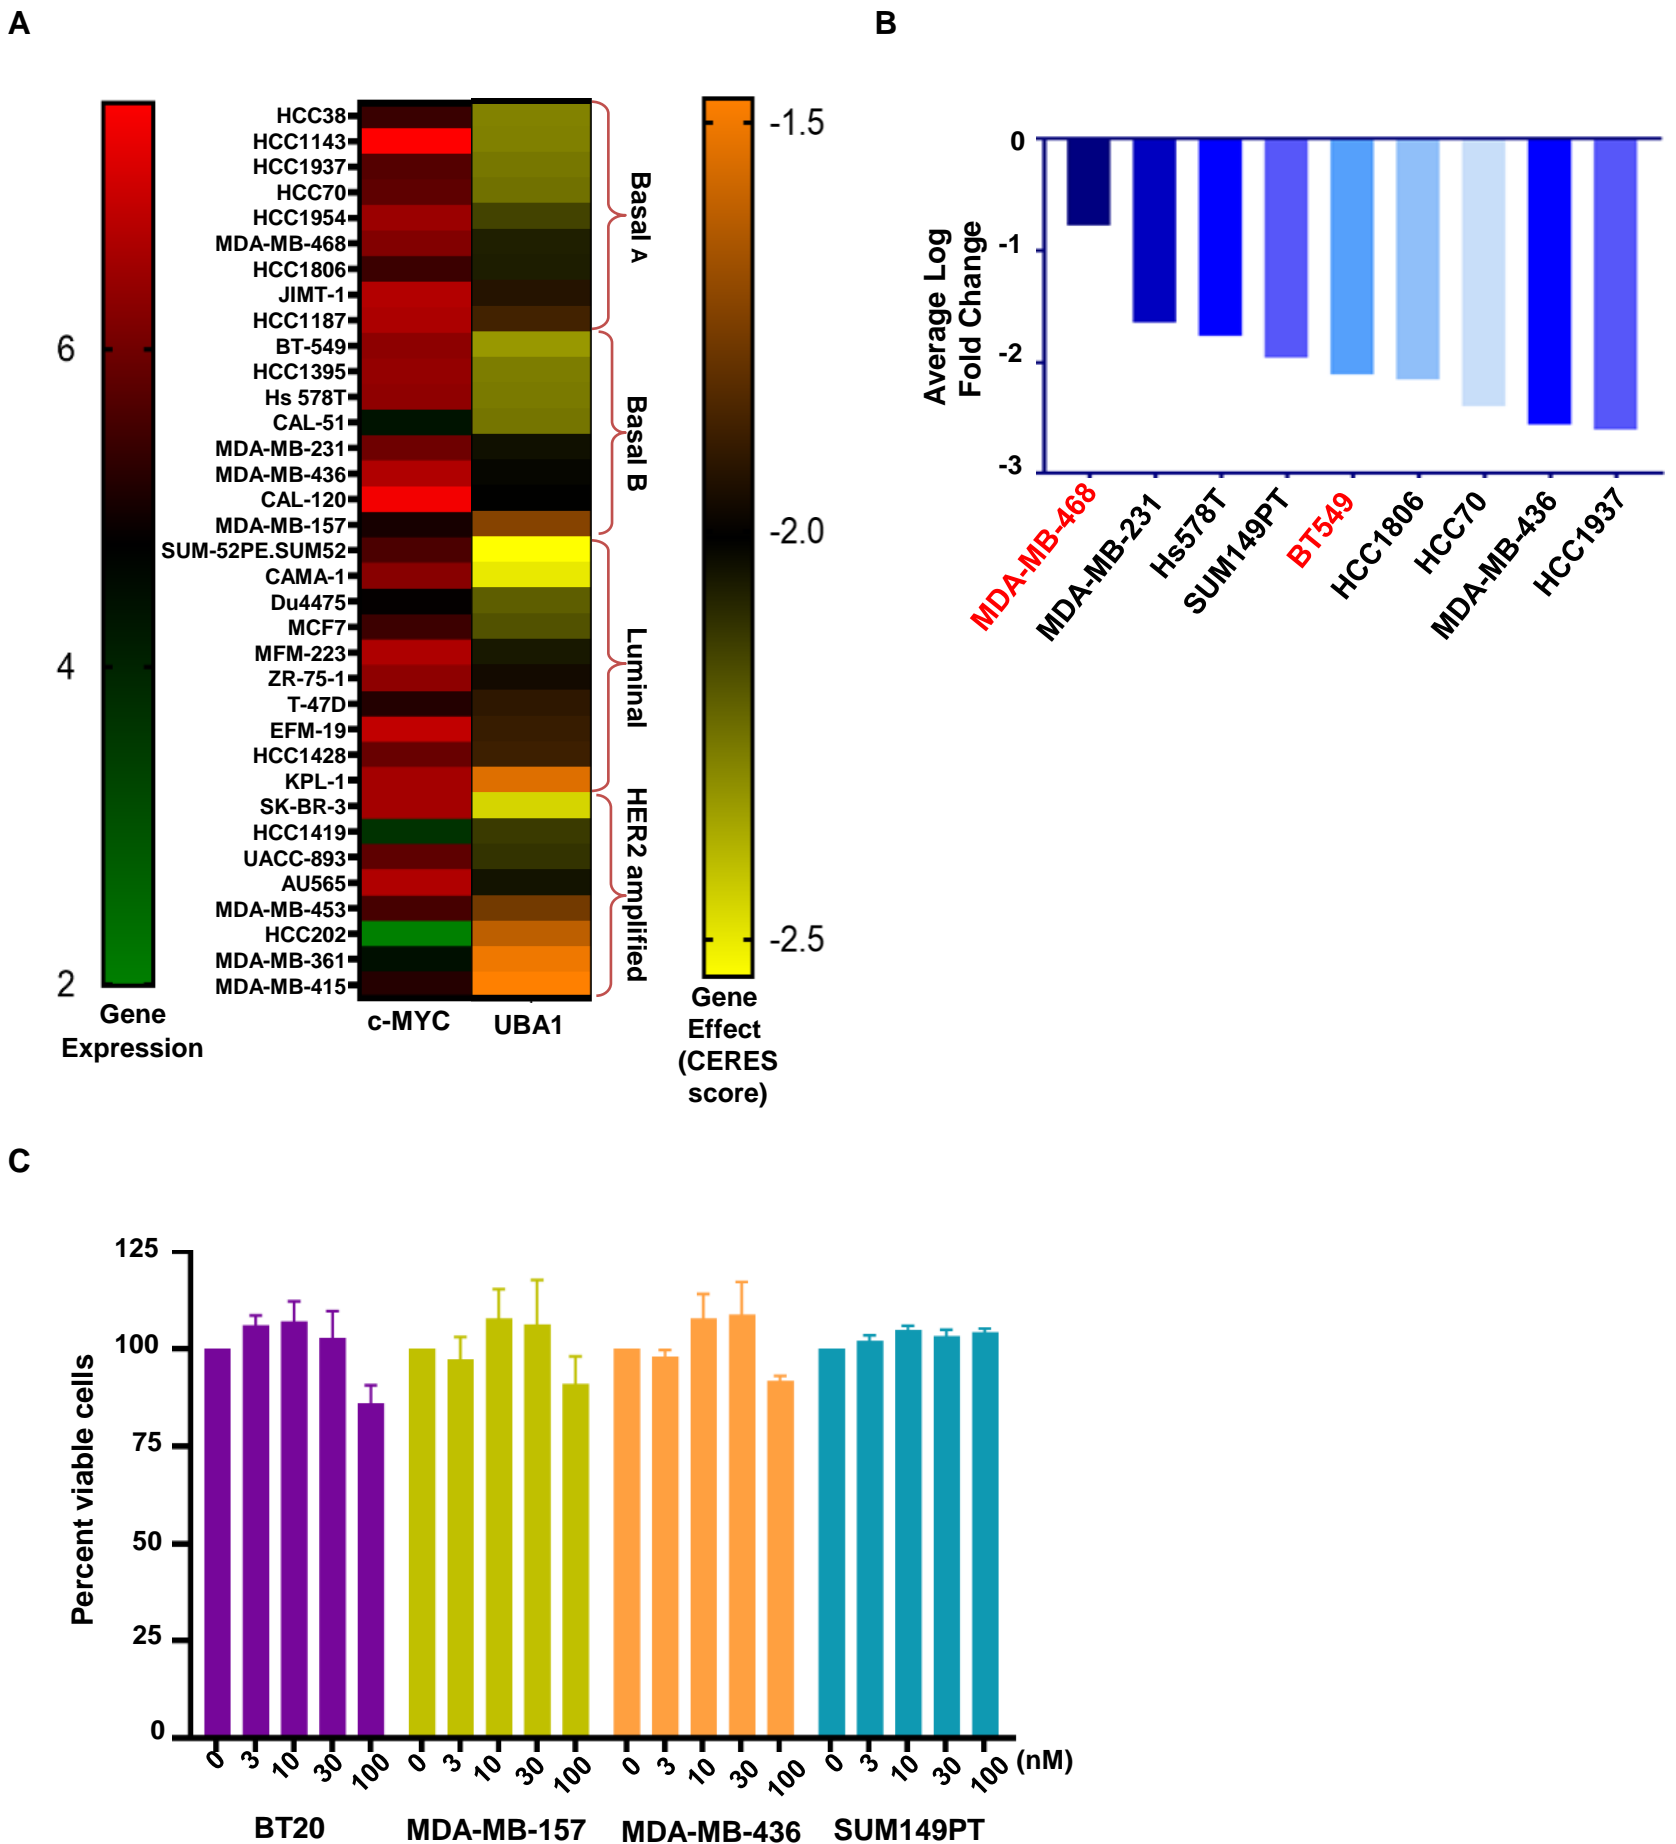

**Figure S1. UBA1 expression levels in TNBC lines.** (A) Heat map represents CERES score of UBA1 gene in CRISPR knock out cells and c-MYC expression obtained in various breast cancer models. (B) Graph represents average Log Fold Change (LFC) in the expression of guide RNAs against UBA1 in nine TNBC cell lines. Average LFC was calculated from LFC of 10 clones/sgRNA of UBA1 in the CRISPR analysis. (C) Graph represents percent viable cells assessed by CellTiter-Glo in TNBCs lines BT-20, MDA-MB-157, MDA-MB-436 and SUM149PT following 72 h treatment with TAK-243 at the indicated concentration.

A

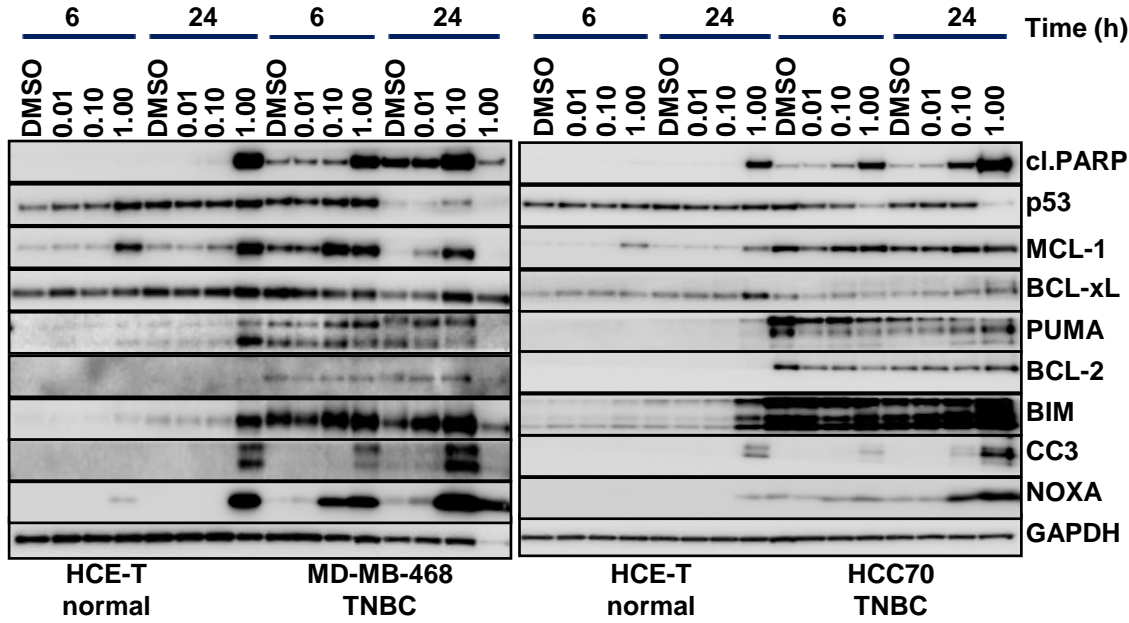

B

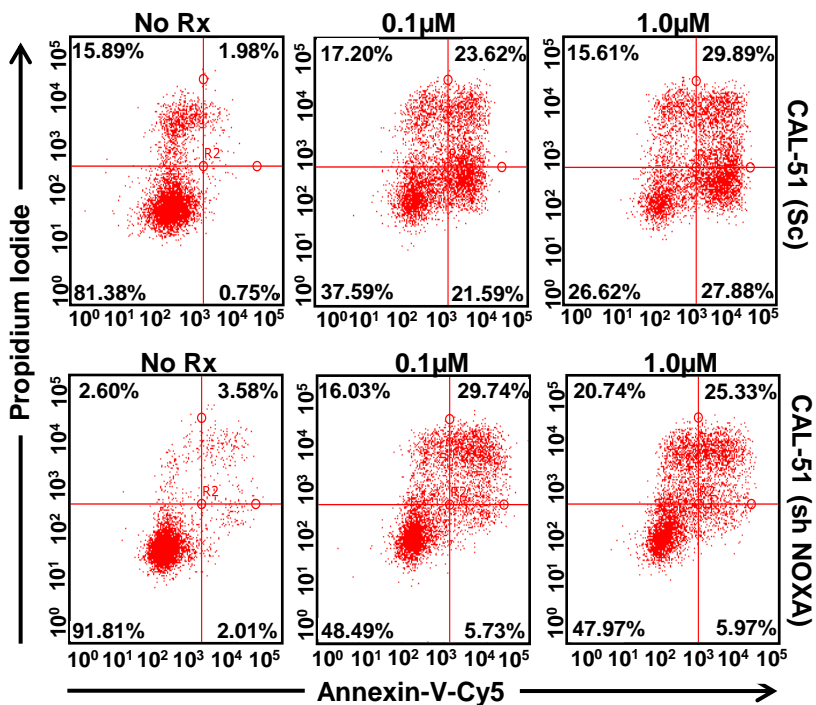

C

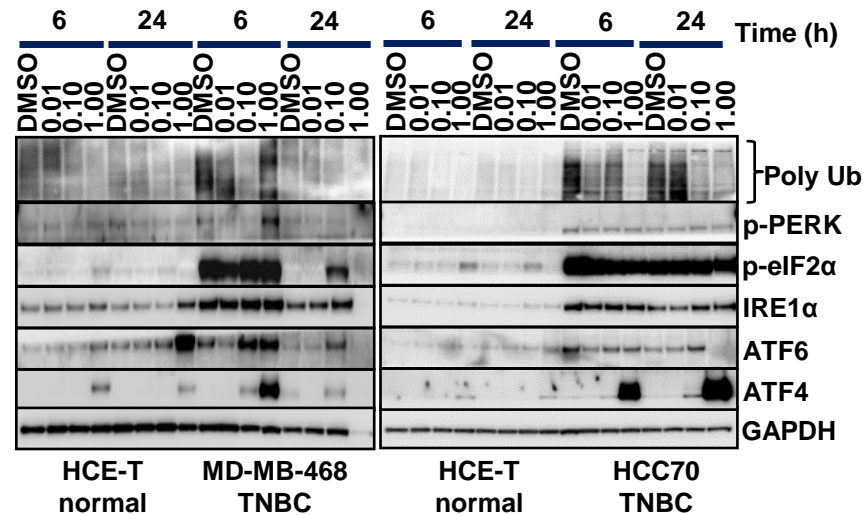

**Fig S2. TAK-243 induced cell death in TNBC.** (A) Western blot analysis showing dose response and time course of the effects of TAK-243 on ubiquitination and apoptosis in TNBC (MDA-MB-468 and HCC70) and normal tissue-derived HCE-T cells, as assessed by immunoblotting for p53, MCL-1, Bcl-xL, BIM, PUMA, cleaved Caspase 3 (CC3) and NOXA. GAPDH was used as a loading control. (B) FACS analysis demonstrating Annexin-V-Cy5 and Propidium Iodide staining in pLKO.1-shRNA control and CAL-51 NOXA knockdown stable cells following 24h treatment with TAK-243 at the indicated concentrations. (C) Western blot analysis showing dose response and time course of the effects of TAK-243 on UPR proteins in TNBC (MDA-MB-468 and HCC70) and normal tissue-derived HCE-T cells, as assessed by immunoblotting for ATF4 and ATF6. Polyubiquitin (polyUb) indicates ubiquitin engagement in these cells. GAPDH was used as a loading control.

A

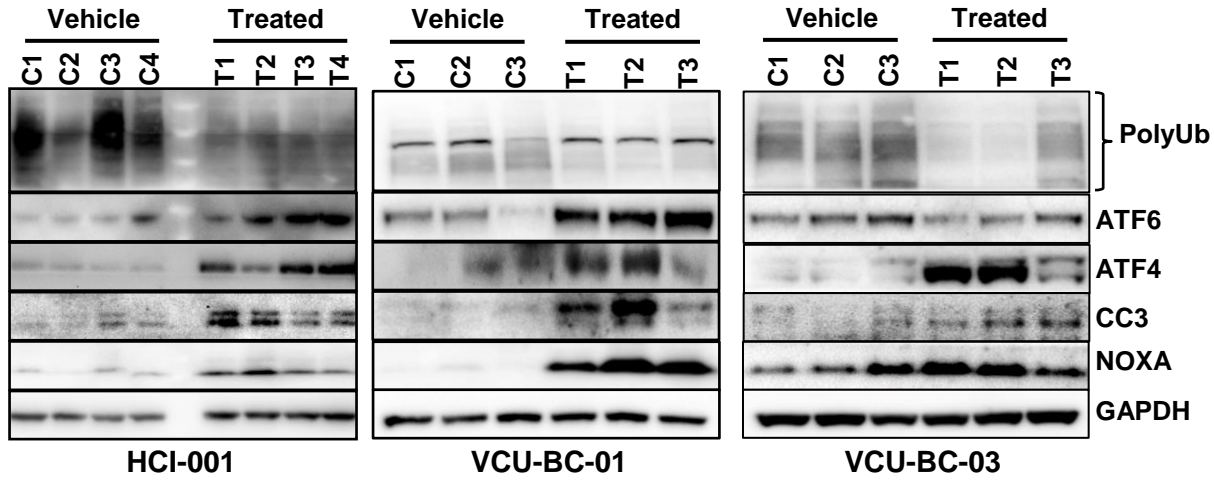

B

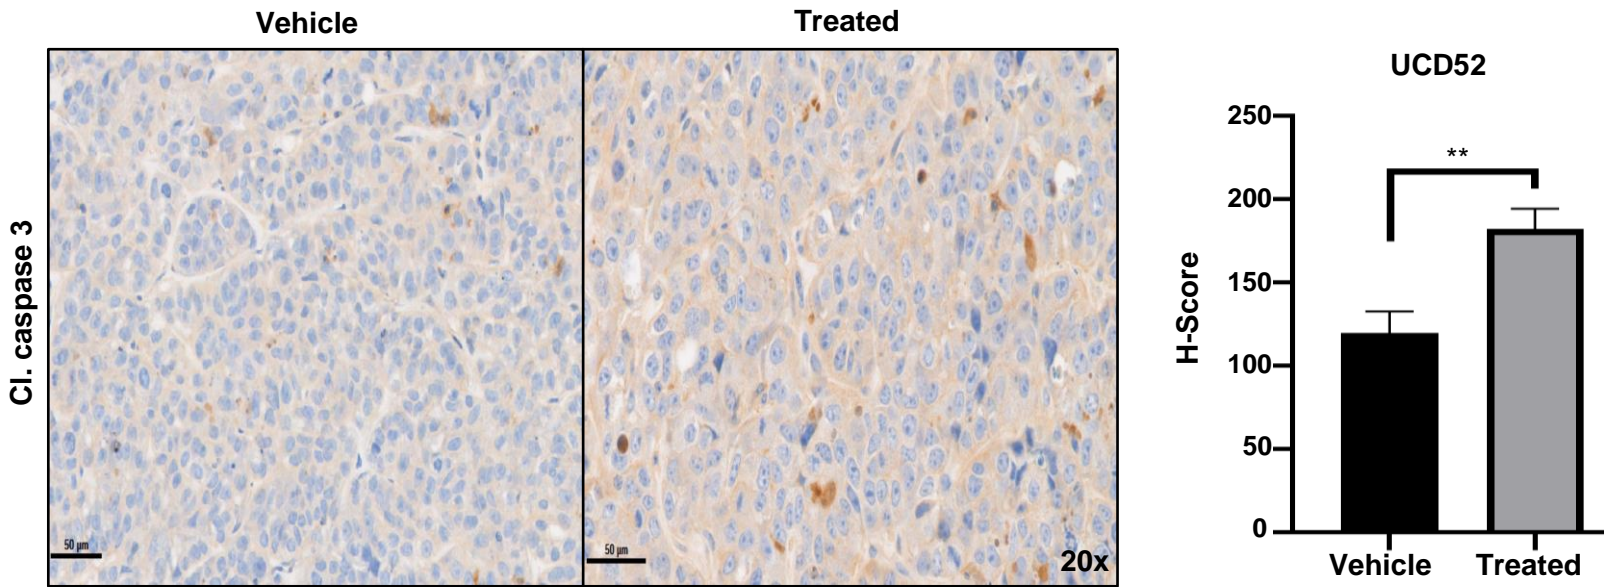

**Figure S3. TAK-243 induces cell death *in vivo*.** (A) Western blot analysis showing effects of TAK-243 on UPR and apoptotic proteins in PDX HCl-001, VCU-BC-01 and VCU-BC-03 mice treated with TAK-243, as assessed by immunoblotting for polyubiquitin (polyUb), ATF4, ATF6, CC3 and NOXA. GAPDH was used as a loading control. (B) Representative images of cl. caspase 3 (CC3) staining in UCD52 PDX of vehicle (DMSO) or TAK-243 (25mg/kg, biweekly for 3 weeks) treated tumors. Total magnification 20x (scale bar: 50µm). Graph indicates H-Score analysis of the staining in the vehicle and TAK-243 treated tumor tissues (\*\*p<0.01).



A

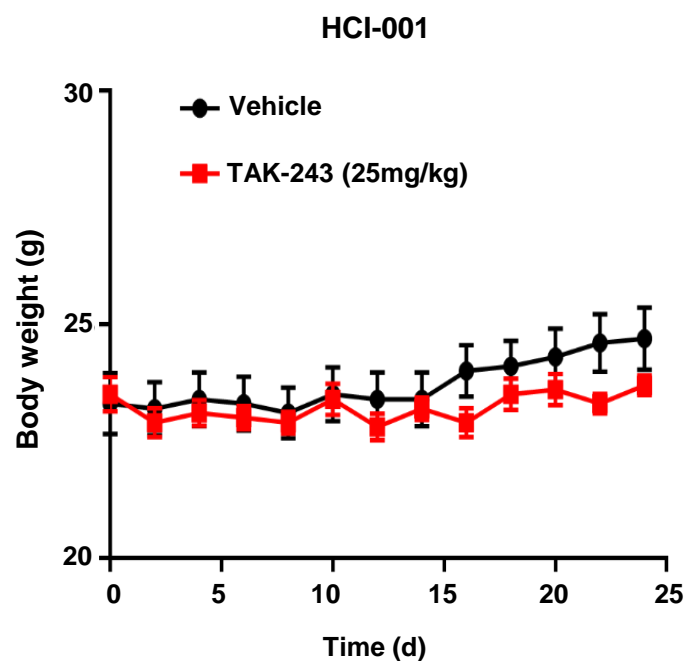

B

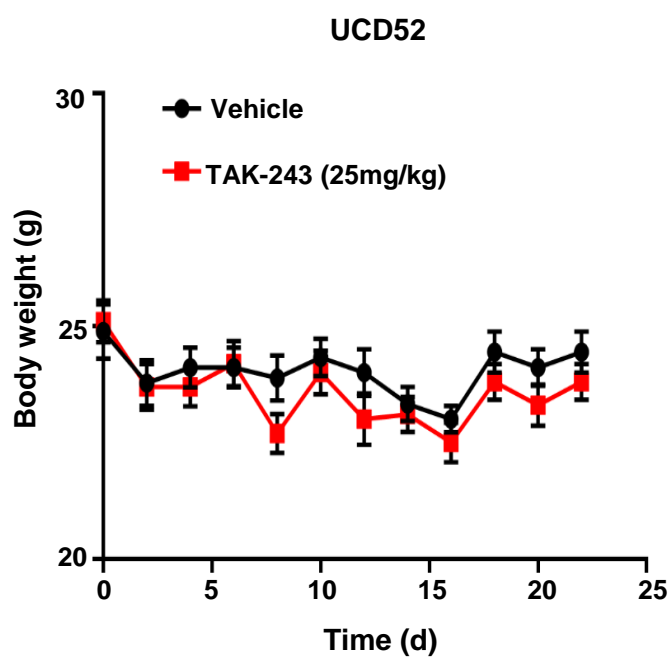

C

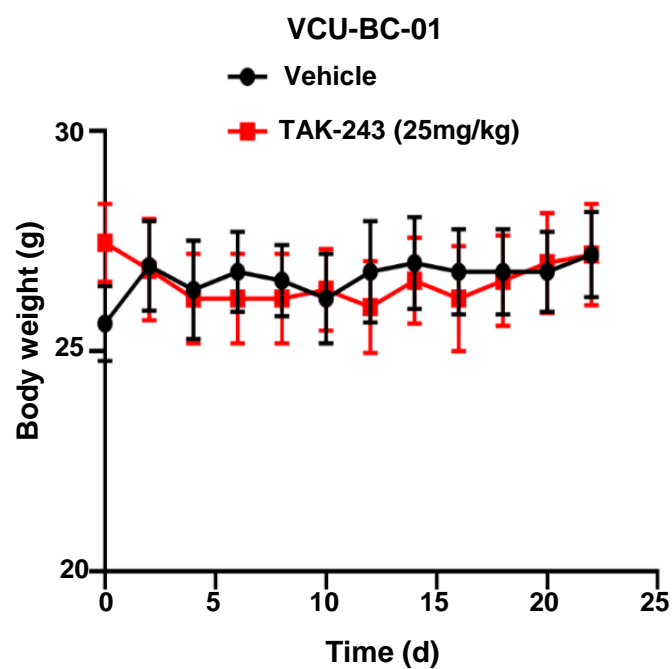

D

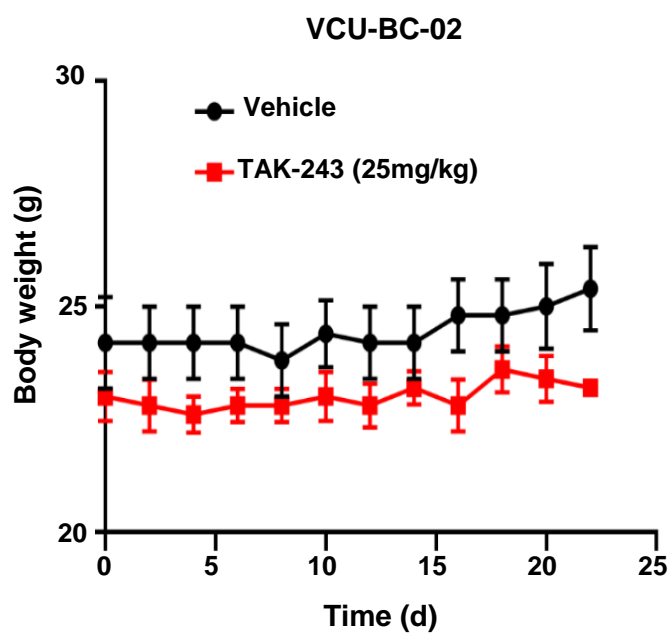

E

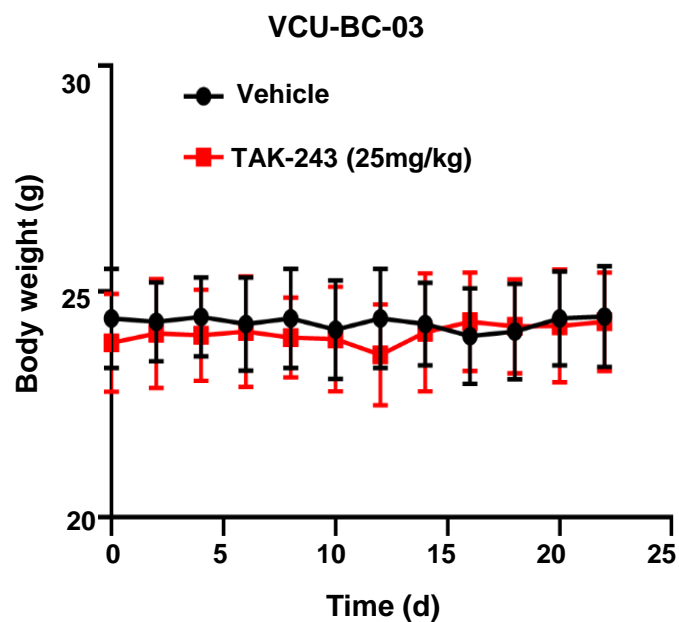

**Fig S4. TAK-243 has minimal effect on animal weight.** Graph displays the mouse weights of NSG mice bearing (A) PDX HCI-001, (B) PDX UCD52, (C) VCU-BC-01, (D) VCU-BC-02 and (E) VCU-BC-03 throughout the efficacy studies.

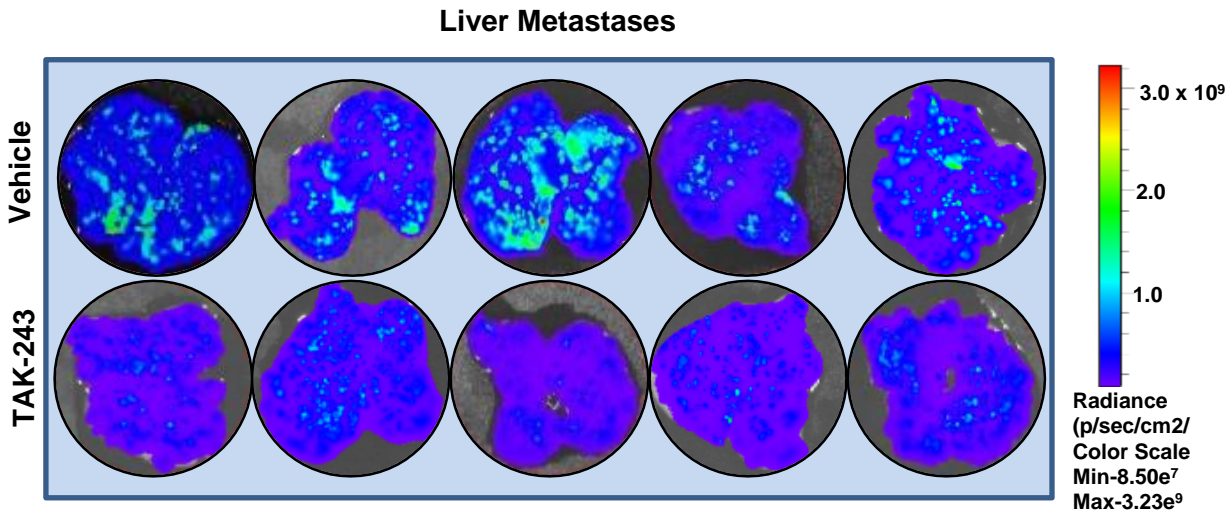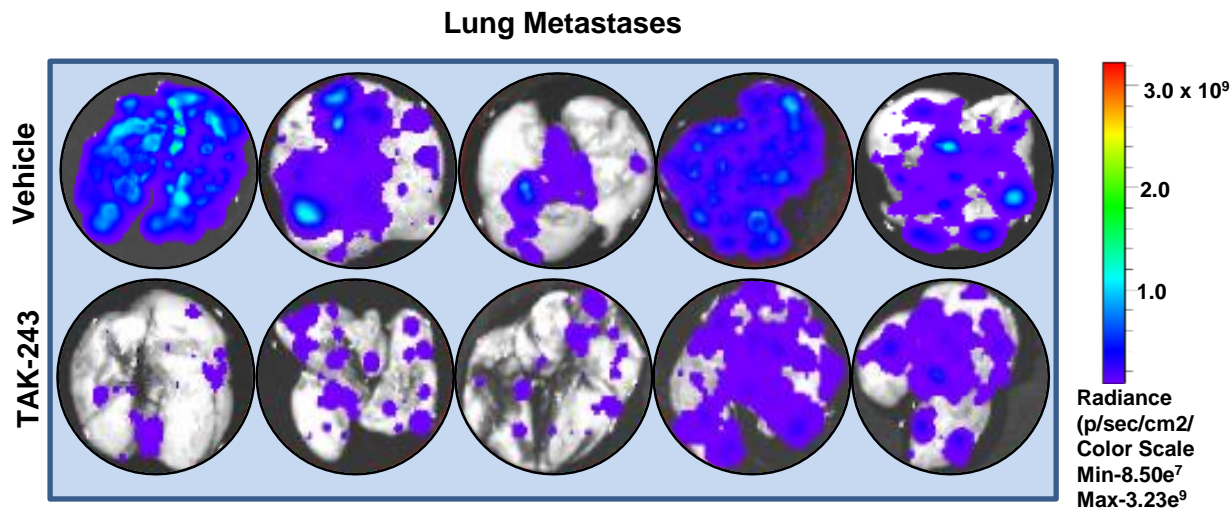

**Fig S5. TAK-243 decreases metastases in primary organs.** Images represent total metastases quantified *ex vivo* in the liver and lung of the vehicle and TAK-243 treated mice.
